# Supplementary material for: Effects of tDCS on the attentional blink revisited: A statistical evaluation of a replication attempt
Source: PubMed Central journal article supplement (PMC8794161; doi:10.1371/journal.pone.0262718), 2022-01-27

anodal cathodal

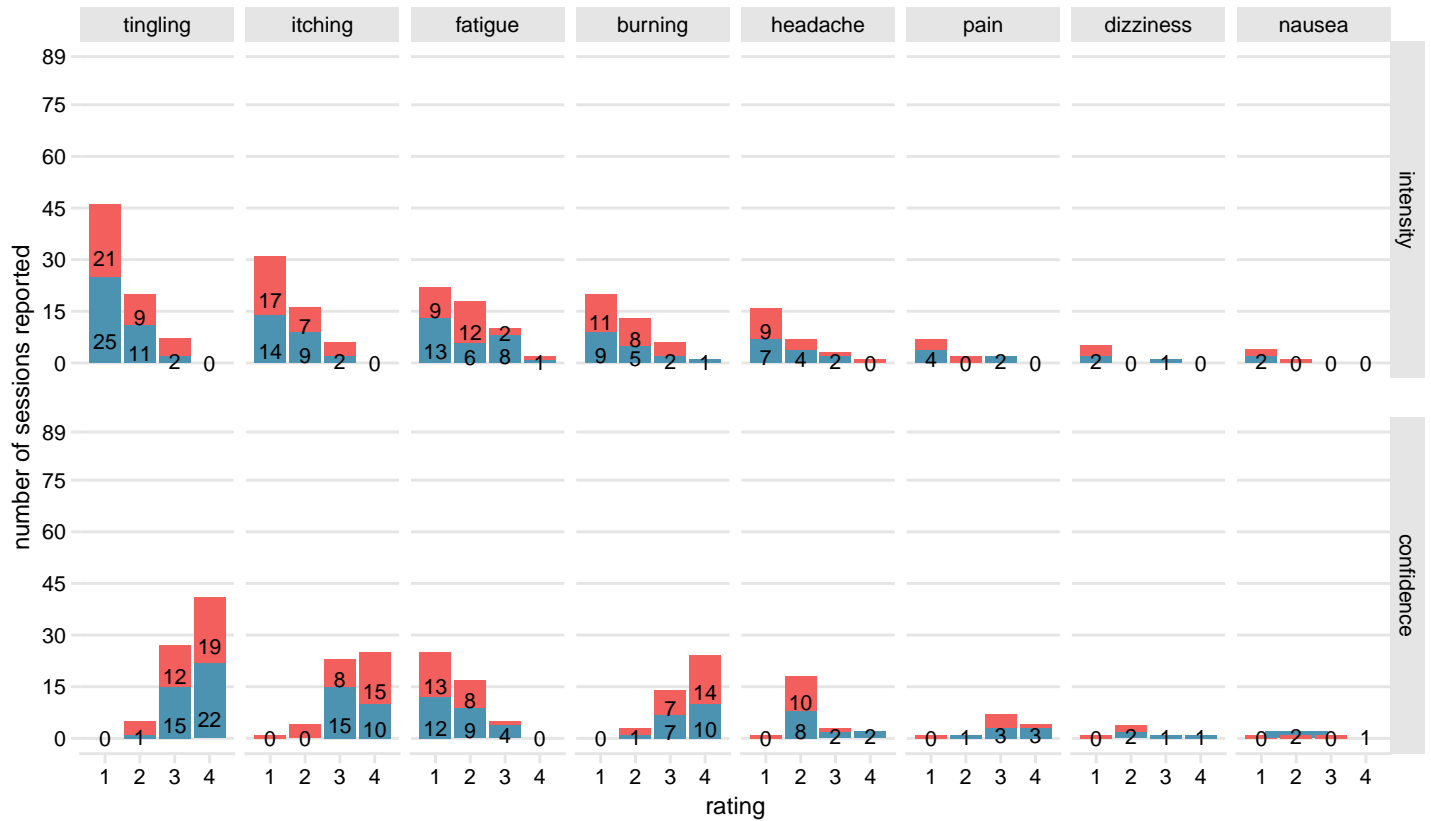

Supplement: pone.0262718.s001.pdf [file pone.0262718.s001.pdf]
